# Supplementary material
Source: publisher site journal article supplement (https://www.dovepress.com/article/469376)
Supplement: Supplementary file 1 [file get_supplementary_file.php]

Supplementary Material

# Supplemental material and methods

**Measurement of anthropometric measurements**

Anthropometric measurements were taken by trained nurses. Data for height, weight, and waist circumference (WC) were acquired following a protocol standardized to an accuracy of 0.1 kg and 0.1 cm, respectively. During the measurements, participants were asked to wear light clothing, no hats, and no shoes. At the end of normal expiration, WC was measured from the midpoint between the lower ribs and the upper edge of the iliac crest to the nearest 0.1 cm. Baseline blood pressure was measured using a mercury sphygmomanometer after the patient had rested quietly for at least 10 minutes, and the average of multiple measurements was taken as the systolic and diastolic blood pressure values. BMI was calculated using the formula BMI = weight (kg)/height (m2).

**Definitions**

Smoking and drinking habits were classified as never, past, or current. Diabetes mellitus was defined by the use of diabetes medications, a fasting blood glucose level ≥ 7.0 mmol/L, or a self-reported physician diagnosis of diabetes. Both continuous positive airway pressure (CPAP) therapy and oral appliance therapy were categorized as either regular or irregular, as mentioned earlier.

**Details of polysomnography**

The study was conducted in an accredited sleep laboratory. In the sleep lab, the sleep schedule was regulated, with a “lights-out” time of 12:00 pm and a “lights-on” time of 8:00 am. Participants were not permitted to sleep before lights-out time or sleep past lights-on time. Polysomnography (PSG) consisted of electroencephalograms (C4-A1, O2-A1), right and left electrooculograms, electrocardiogram (ECG), submental and anterior tibial electromyograms, thoracic and abdominal respiratory movements, pulse oxygen saturation, end-tidal and transcutaneous carbon dioxide, oronasal airflow, and nasal pressure. Studies were recorded on an E-series Sleep System (Compumedics, Melbourne, VIC, Australia) and included digital video and audio monitoring.

Studies were scored at a centralized sleep reading center (the People’s Hospital of Xinjiang Uygur Autonomous Region, Urumqi, Xinjiang, China) by registered polysomnographic technologists. Sleep and arousal were staged using standard criteria [1]. Sleep stages were scored using 30-s epochs according to Rechtschaffen and Kales criteria [2, 3], and sleep architecture variables were noted as a percent of total sleep time for stages NREM 1, NREM 2, NREM 3, and REM sleep. Arousals were scored according to published guidelines and summarized as the total number of arousals per hour of sleep (arousal index) [4].

To enable the calculation of alternative definitions of the apnea-hypopnea index (AHI), respiratory events were initially identified by changes in signal amplitude only. Specifically, apneas were identified as complete reductions in the thermocouple signal for ≥10 seconds and hypopneas as approximately 30% reductions in the nasal pressure or inductance signals for ≥10 seconds. Each event was annotated as to its associated oxygen saturation nadir and whether it resulted in an EEG arousal. Apnoea was defined as a 90% decrease in airflow lasting for at least 10 seconds. Hypopneas were defined by ≥ 30% decrement in the amplitude of the nasal pressure flow signal for at least 10 seconds, associated with a 4% arterial oxygen desaturation (with or without arousal). The AHI was defined as the total number of apneas and hypopneas per hour of sleep.

**Definition of CVD**

In our study, CVD included two categories: CHD and stroke.

CHD was defined as a fatal or nonfatal myocardial infarction, unstable angina, and coronary revascularization (coronary artery bypass grafting or percutaneous transluminal coronary angioplasty). Myocardial infarction diagnosis required an increase in cardiac enzymes with 1 of the following symptoms: ischemic chest pain, evolutionary ST-T segment changes, or new Q waves [5]. The diagnosis of unstable angina requires hospitalization or outpatient follow-up, and according to Braunwald's diagnosis, it must meet at least one of the following eligibility criteria: Occurring at rest or minimal exertion and usually lasting > 20 min (if not interrupted with nitroglycerine administration); Being new-onset (within 1 month) and severe and described as frank pain Occurring with a crescendo pattern (more severe, prolonged, or frequent than before); in the absence of signs of ST-segment elevation myocardial infarction in left-sided, right-sided, and posterior ECGs, and/or positive cardiac biomarkers.

Stroke (both ischemic and hemorrhagic) was defined as a fixed neurologic deficit that lasted at least 24 hours or until death.

**Details of the statistical analyses**.

The participants were divided into three categories according to the tertile of WWI. Continuous variables are presented as means and standard deviations or medians and interquartile ranges (when appropriate), and categorical variables are presented as counts and frequencies. Differences in the characteristics across WWI categories were tested using analysis of variance or the Kruskal–Wallis test for continuous variables according to distribution and using Chi-square for categorical variables. The person-years were determined from the date when the message was collected at baseline to either the date of CVD, death or the date of participating in the last examination in this analysis, whichever came first. The Kaplan–Meier method was performed to evaluate the incidence rate of CVD and its subtypes, and the differences among groups were evaluated using the log-rank test.

Multicollinearity was checked for the variables of multivariable analysis and was defined as a variance inflation factor of >10 (Table S1). A Cox proportional hazard regression model was applied to calculate the hazard ratios (HRs) and 95% confidence intervals (CIs) for CVD and its subtypes. The proportional hazard assumption was evaluated by visualization of Schoenfeld residuals, and no potential violation was observed. Five models were constructed. Model 1: not adjusted (univariate). Model 2: adjusted for age and sex. Model 3: Model 2 plus adjustment for smoking status, drinking status, SBP, DBP, and diabetes. Model 4: Model 3 plus adjustment for eGFR, TC, TG, HDL-C, LDL-C, FPG, and AHI. Model 5: Model 4 plus adjustment for use of antidiabetic drugs, aspirins, statins, OSA therapy, and antihypertensive drugs. P-values for the trend were computed using the tertile of WWI as the ordinal variable. To capture the dose–response relationship between WWI and the risk of CVD, restricted cubic splines analysis was used, with four knots at the 5th, 35th, 65th, and 95th percentiles of the WWI distribution. After adjusting for all potential confounding variables, we used a two-piece-wise Cox proportional hazard regression model with smoothing to explore the threshold for the association between WWI and incident CVD events. Inflection points were identified by using likelihood-ratio test and the bootstrap resampling method. The receiver operating curve (ROC) was used to compare the predictive value of WWI and BMI

Additional analyses were performed to validate the robustness of the results. First, to explore the potential impact of reverse causality, we repeated the primary analysis using a 2-year lag period by excluding participants who developed CVD cases within the first 2 years of follow-up. Second, the competing risk model was applied to assess the associations between WWI and the outcomes, with non-CVD death being considered a competing risk event. Third, a restricted analysis was performed by excluding patients on OSA therapy. Lastly, we estimated the E-value to assess the potential impact of unmeasured confounders on our study findings. Subgroup analyses were conducted on the participants after stratification by age (< 50 or ≥ 50 years), sex, BMI, diabetes, smoking status, drinking status, SBP (< 140 or ≥ 140 mmHg), DBP (< 90 or ≥ 90 mmHg), and AHI (< 15, 15–29, and ≥ 30 events/h) to identify any modification by these variables, interactions between subgroups were tested for using likelihood ratio tests, in which models with and without multiplicative interaction terms were compared.

All analyses were performed using R software version 4.1.1 (R Core Team, Vienna, Austria). All the statistical tests were two-sided, and P < 0.05 was considered statistical significance.

# Supplementary Figures and Tables

## Supplementary Tables

**Table S1**. Collinearity diagnostics steps.

|  | Step 1 | Step 2 |
| --- | --- | --- |
| WWI | 61 | 1.2 |
| Sex | 1.8 | 1.8 |
| Age | 1.4 | 1.4 |
| Diabetes | 1.7 | 1.6 |
| Smoking status | 1.6 | 1.6 |
| Drinking status | 1.5 | 1.5 |
| BMI | 46 | NA |
| WC | 32 | NA |
| SBP | 2.2 | 2.2 |
| DBP | 2.4 | 2.4 |
| eGFR | 1.1 | 1.1 |
| TC | 1.9 | 1.9 |
| TG | 1.4 | 1.4 |
| HDL-C | 1.4 | 1.3 |
| LDL-C | 1.7 | 1.7 |
| FPG | 1.7 | 1.7 |
| AHI | 1.1 | 1.1 |
| ACEIs/ARBs | 1.1 | 1.1 |
| Beta-blockers | 1 | 1 |
| Calcium channel blockers | 1 | 1 |
| Diuretics | 1 | 1 |
| Aspirins | 1.5 | 1.4 |
| Statins | 1.8 | 1.8 |
| Antidiabetic drugs | 1.2 | 1.2 |
| Obstructive sleep apnea therapy | 1 | 1 |

VIF = 1/(1-R2). VIF step-by-step screening method: Calculate the VIF of each variable. If the maximum VIF value is≥10, remove the variable with the maximum VIF value.

VIF: variance inflation factors. For other abbreviations, see Table 1.

**Table S2.** Comparative analysis of three obesity indicators.

| Test | AUC | 95%CI low | 95%CI up | Specificity | Sensitivity | Positive-LR | Negative-LR | Postive-pv | Negative-pv |
| --- | --- | --- | --- | --- | --- | --- | --- | --- | --- |
| **CVD** |  |  |  |  |  |  |  |  |  |
| BMI | 0.591 | 0.557 | 0.625 | 0.457 | 0.701 | 1.290 | 0.655 | 0.177 | 0.901 |
| WC | 0.569 | 0.536 | 0.603 | 0.585 | 0.553 | 1.330 | 0.765 | 0.182 | 0.887 |
| WWI | 0.622 | 0.589 | 0.655 | 0.651 | 0.540 | 1.549 | 0.706 | 0.205 | 0.895 |
| **CHD** |  |  |  |  |  |  |  |  |  |
| BMI | 0.577 | 0.535 | 0.619 | 0.673 | 0.478 | 1.463 | 0.776 | 0.125 | 0.930 |
| WC | 0.581 | 0.542 | 0.620 | 0.511 | 0.662 | 1.354 | 0.662 | 0.117 | 0.940 |
| WWI | 0.610 | 0.572 | 0.649 | 0.593 | 0.622 | 1.526 | 0.639 | 0.130 | 0.941 |
| **Stroke** |  |  |  |  |  |  |  |  |  |
| BMI | 0.596 | 0.542 | 0.651 | 0.799 | 0.382 | 1.900 | 0.774 | 0.098 | 0.958 |
| WC | 0.538 | 0.483 | 0.593 | 0.728 | 0.382 | 1.404 | 0.849 | 0.075 | 0.954 |
| WWI | 0.618 | 0.564 | 0.672 | 0.790 | 0.431 | 2.056 | 0.720 | 0.106 | 0.960 |

Abbreviations: ROC, receiver operating curve; AUC, area under the curve; Positive pv, Positive predictive value; Negative pv, Negative predictive value; Positive-LR, positive likelihood ratio; Negative-LR, negative likelihood ratio

**Table S3.** Sensitivity analyses were performed after excluding participants who developed study outcomes within the first two years of follow-up.

| Exposure | Model 1 | Model 2 | Model 3 | Model 4 | Model 5 |
| --- | --- | --- | --- | --- | --- |
|  | HR (95% CI) | HR (95% CI) | HR (95% CI) | HR (95% CI) | HR (95% CI) |
| CVD |  |  |  |  |  |
| Continuous |  |  |  |  |  |
| WWI, per 1 cm/√kg increase | 1.27 (1.16, 1.39) | 1.29 (1.18, 1.41) | 1.26 (1.16, 1.38) | 1.23 (1.12, 1.36) | 1.23 (1.12, 1.35) |
| WWI quartiles |  |  |  |  |  |
| Quartile 1 | Reference | Reference | Reference | Reference | Reference |
| Quartile 2 | 1.16 (0.80, 1.69) | 1.18 (0.81, 1.71) | 1.18 (0.81, 1.71) | 1.20 (0.83, 1.76) | 1.18 (0.81, 1.73) |
| Quartile 3 | 1.46 (1.03, 2.08) | 1.51 (1.07, 2.15) | 1.48 (1.03, 2.10) | 1.46 (1.02, 2.10) | 1.46 (1.01, 2.10) |
| Quartile 4 | 1.80 (1.28, 2.53) | 1.88 (1.34, 2.65) | 1.78 (1.25, 2.51) | 1.59 (1.10, 2.29) | 1.56 (1.08, 2.26) |
| P for trend | <0.001 | <0.001 | 0.001 | 0.008 | 0.010 |
| CHD |  |  |  |  |  |
| Continuous |  |  |  |  |  |
| WWI, per 1 cm/√kg increase | 1.25 (1.11, 1.39) | 1.27 (1.13, 1.42) | 1.23 (1.10, 1.38) | 1.21 (1.07, 1.36) | 1.20 (1.06, 1.36) |
| WWI quartiles |  |  |  |  |  |
| Quartile 1 | Reference | Reference | Reference | Reference | Reference |
| Quartile 2 | 1.24 (0.78, 1.99) | 1.26 (0.79, 2.02) | 1.26 (0.79, 2.03) | 1.29 (0.80, 2.08) | 1.24 (0.77, 2.01) |
| Quartile 3 | 1.52 (0.97, 2.37) | 1.58 (1.01, 2.48) | 1.52 (0.96, 2.39) | 1.50 (0.94, 2.38) | 1.49 (0.93, 2.39) |
| Quartile 4 | 1.75 (1.12, 2.71) | 1.84 (1.18, 2.87) | 1.72 (1.09, 2.69) | 1.54 (0.96, 2.48) | 1.50 (0.93, 2.42) |
| P for trend | 0.008 | 0.004 | 0.013 | 0.063 | 0.075 |
| Stroke |  |  |  |  |  |
| Continuous |  |  |  |  |  |
| WWI, per 1 cm/√kg increase | 1.31 (1.14, 1.51) | 1.33 (1.15, 1.53) | 1.31 (1.14, 1.52) | 1.27 (1.09, 1.48) | 1.27 (1.09, 1.49) |
| WWI quartiles |  |  |  |  |  |
| Quartile 1 | Reference | Reference | Reference | Reference | Reference |
| Quartile 2 | 1.05 (0.57, 1.91) | 1.05 (0.57, 1.92) | 1.05 (0.57, 1.92) | 1.08 (0.58, 2.00) | 1.08 (0.58, 1.99) |
| Quartile 3 | 1.39 (0.79, 2.43) | 1.41 (0.80, 2.49) | 1.40 (0.79, 2.48) | 1.43 (0.80, 2.56) | 1.42 (0.79, 2.55) |
| Quartile 4 | 1.89 (1.11, 3.23) | 1.94 (1.13, 3.33) | 1.86 (1.08, 3.22) | 1.66 (0.93, 2.95) | 1.65 (0.92, 2.94) |
| P for trend | 0.010 | 0.007 | 0.013 | 0.056 | 0.059 |

Model 1: not adjusted (univariate).

Model 2: adjusted for age and sex.

Model 3: Model 2 plus adjustment for smoking status, drinking status, SBP, DBP, and diabetes.

Model 4: Model 3 plus adjustment for eGFR, TC, TG, HDL-C, LDL-C, FPG, and AHI.

Model 5: Model 4 plus adjustment for use of antidiabetic drugs, aspirins, statins, OSA therapy, and antihypertensive drugs.

Abbreviations: SD, standard deviation; HR, hazards ratio; CI, confidence interval. Other abbreviations, see Table 1.

**Table S4**. Sensitivity analyses were conducted using the Fine-Gray competing risk model, considering non-CVD deaths as competing risk events.

| Exposure | Model 1 | Model 2 | Model 3 | Model 4 | Model 5 |
| --- | --- | --- | --- | --- | --- |
|  | SHR (95% CI) | SHR (95% CI) | SHR (95% CI) | SHR (95% CI) | SHR (95% CI) |
| CVD |  |  |  |  |  |
| Continuous |  |  |  |  |  |
| WWI, per 1 cm/√kg increase | 1.25 (1.15, 1.35) | 1.27 (1.17, 1.38) | 1.26 (1.16, 1.37) | 1.22 (1.12, 1.34) | 1.22 (1.12, 1.34) |
| WWI quartiles |  |  |  |  |  |
| Quartile 1 | Reference | Reference | Reference | Reference | Reference |
| Quartile 2 | 1.15 (0.82, 1.62) | 1.16 (0.82, 1.63) | 1.16 (0.82, 1.64) | 1.19 (0.84, 1.68) | 1.16 (0.82, 1.65) |
| Quartile 3 | 1.34 (0.97, 1.86) | 1.40 (1.00, 1.94) | 1.38 (0.99, 1.93) | 1.36 (0.97, 1.92) | 1.37 (0.97, 1.93) |
| Quartile 4 | 1.78 (1.30, 2.44) | 1.88 (1.37, 2.58) | 1.82 (1.32, 2.52) | 1.64 (1.17, 2.30) | 1.62 (1.15, 2.27) |
| P for trend | <0.001 | <0.001 | <0.001 | 0.003 | 0.004 |
| CHD |  |  |  |  |  |
| Continuous |  |  |  |  |  |
| WWI, per 1 cm/√kg increase | 1.21 (1.09, 1.34) | 1.24 (1.11, 1.37) | 1.22 (1.10, 1.36) | 1.20 (1.07, 1.34) | 1.19 (1.07, 1.34) |
| WWI quartiles |  |  |  |  |  |
| Quartile 1 | Reference | Reference | Reference | Reference | Reference |
| Quartile 2 | 1.20 (0.78, 1.85) | 1.22 (0.79, 1.88) | 1.23 (0.80, 1.89) | 1.24 (0.80, 1.93) | 1.20 (0.78, 1.87) |
| Quartile 3 | 1.39 (0.92, 2.10) | 1.46 (0.96, 2.22) | 1.44 (0.94, 2.18) | 1.41 (0.92, 2.17) | 1.42 (0.92, 2.19) |
| Quartile 4 | 1.68 (1.12, 2.51) | 1.79 (1.19, 2.70) | 1.73 (1.15, 2.62) | 1.58 (1.02, 2.44) | 1.55 (1.00, 2.40) |
| P for trend | 0.009 | 0.003 | 0.006 | 0.035 | 0.039 |
| Stroke |  |  |  |  |  |
| Continuous |  |  |  |  |  |
| WWI, per 1 cm/√kg increase | 1.31 (1.15, 1.49) | 1.33 (1.16, 1.52) | 1.32 (1.15, 1.51) | 1.27 (1.10, 1.47) | 1.27 (1.10, 1.47) |
| WWI quartiles |  |  |  |  |  |
| Quartile 1 | Reference | Reference | Reference | Reference | Reference |
| Quartile 2 | 1.06 (0.60, 1.87) | 1.06 (0.60, 1.87) | 1.06 (0.60, 1.87) | 1.09 (0.61, 1.94) | 1.08 (0.61, 1.92) |
| Quartile 3 | 1.27 (0.74, 2.17) | 1.30 (0.75, 2.22) | 1.30 (0.75, 2.23) | 1.30 (0.74, 2.27) | 1.29 (0.74, 2.26) |
| Quartile 4 | 1.95 (1.18, 3.22) | 2.02 (1.22, 3.34) | 1.97 (1.18, 3.28) | 1.73 (1.01, 2.97) | 1.72 (1.00, 2.96) |
| P for trend | 0.005 | 0.003 | 0.005 | 0.036 | 0.038 |

Model 1: not adjusted (univariate).

Model 2: adjusted for age and sex.

Model 3: Model 2 plus adjustment for smoking status, drinking status, SBP, DBP, and diabetes.

Model 4: Model 3 plus adjustment for eGFR, TC, TG, HDL-C, LDL-C, FPG, and AHI.

Model 5: Model 4 plus adjustment for use of antidiabetic drugs, aspirins, statins, OSA therapy, and antihypertensive drugs.

Abbreviations: SD, standard deviation; SHR, sub-hazard ratio; CI, confidence interval. Other abbreviations, see Table 1.

**Table S5**. Sensitivity analyses were performed after excluding patients on OSA therapy.

| Exposure | Model 1 | Model 2 | Model 3 | Model 4 | Model 5 |
| --- | --- | --- | --- | --- | --- |
|  | HR (95% CI) | HR (95% CI) | HR (95% CI) | HR (95% CI) | HR (95% CI) |
| CVD |  |  |  |  |  |
| Continuous |  |  |  |  |  |
| WWI, per 1 cm/√kg increase | 1.25 (1.15, 1.36) | 1.28 (1.17, 1.39) | 1.26 (1.16, 1.37) | 1.22 (1.12, 1.34) | 1.22 (1.11, 1.33) |
| WWI quartiles |  |  |  |  |  |
| Quartile 1 | Reference | Reference | Reference | Reference | Reference |
| Quartile 2 | 1.12 (0.79, 1.59) | 1.13 (0.80, 1.61) | 1.14 (0.80, 1.62) | 1.19 (0.84, 1.68) | 1.16 (0.82, 1.64) |
| Quartile 3 | 1.37 (0.98, 1.91) | 1.43 (1.02, 2.00) | 1.41 (1.01, 1.98) | 1.36 (0.97, 1.92) | 1.35 (0.96, 1.90) |
| Quartile 4 | 1.82 (1.32, 2.50) | 1.92 (1.39, 2.65) | 1.85 (1.33, 2.56) | 1.64 (1.17, 2.30) | 1.60 (1.14, 2.24) |
| P for trend | <0.001 | <0.001 | <0.001 | 0.003 | 0.005 |
| CHD |  |  |  |  |  |
| Continuous |  |  |  |  |  |
| WWI, per 1 cm/√kg increase | 1.22 (1.10, 1.36) | 1.25 (1.12, 1.39) | 1.23 (1.11, 1.37) | 1.20 (1.07, 1.34) | 1.19 (1.06, 1.33) |
| WWI quartiles |  |  |  |  |  |
| Quartile 1 | Reference | Reference | Reference | Reference | Reference |
| Quartile 2 | 1.18 (0.77, 1.82) | 1.19 (0.77, 1.84) | 1.20 (0.78, 1.86) | 1.24 (0.80, 1.93) | 1.20 (0.77, 1.86) |
| Quartile 3 | 1.34 (0.88, 2.05) | 1.40 (0.91, 2.15) | 1.38 (0.90, 2.12) | 1.41 (0.92, 2.17) | 1.39 (0.90, 2.14) |
| Quartile 4 | 1.73 (1.15, 2.60) | 1.83 (1.21, 2.75) | 1.77 (1.17, 2.68) | 1.58 (1.02, 2.44) | 1.52 (0.98, 2.36) |
| P for trend | 0.006 | 0.003 | 0.006 | 0.035 | 0.047 |
| Stroke |  |  |  |  |  |
| Continuous |  |  |  |  |  |
| WWI, per 1 cm/√kg increase | 1.31 (1.14, 1.50) | 1.33 (1.16, 1.52) | 1.31 (1.14, 1.51) | 1.27 (1.10, 1.47) | 1.27 (1.10, 1.47) |
| WWI quartiles |  |  |  |  |  |
| Quartile 1 | Reference | Reference | Reference | Reference | Reference |
| Quartile 2 | 1.02 (0.57, 1.83) | 1.04 (0.58, 1.87) | 1.03 (0.57, 1.86) | 1.09 (0.61, 1.94) | 1.08 (0.61, 1.92) |
| Quartile 3 | 1.42 (0.82, 2.44) | 1.48 (0.85, 2.55) | 1.47 (0.85, 2.55) | 1.30 (0.74, 2.27) | 1.28 (0.73, 2.24) |
| Quartile 4 | 1.98 (1.18, 3.31) | 2.07 (1.23, 3.49) | 1.98 (1.17, 3.35) | 1.73 (1.01, 2.97) | 1.71 (0.99, 2.94) |
| P for trend | 0.004 | 0.002 | 0.005 | 0.036 | 0.040 |

Model 1: not adjusted (univariate).

Model 2: adjusted for age and sex.

Model 3: Model 2 plus adjustment for smoking status, drinking status, SBP, DBP, and diabetes.

Model 4: Model 3 plus adjustment for eGFR, TC, TG, HDL-C, LDL-C, FPG, and AHI.

Model 5: Model 4 plus adjustment for use of antidiabetic drugs, aspirins, statins, OSA therapy, and antihypertensive drugs.

Abbreviations: SD, standard deviation; HR, hazards ratio; CI, confidence interval. Other abbreviations, see Table 1.

**Table S6**. E-values for the observed associations between WWI and clinical outcomes.

|  | **CVD** | **CHD** | **Stroke** |
| --- | --- | --- | --- |
| Observed association* (per 1 cm/√kg increase) | 1.22 (1.12, 1.34) | 1.20 (1.07, 1.34) | 1.26 (1.09, 1.46) |
| E-value for point estimate | 1.74 | 1.69 | 1.83 |

*The observed associations are the fully adjusted hazard ratios (95% confidence intervals) shown in Table 2 and are presented here for reference.

## 2.2 Supplementary Figures

**
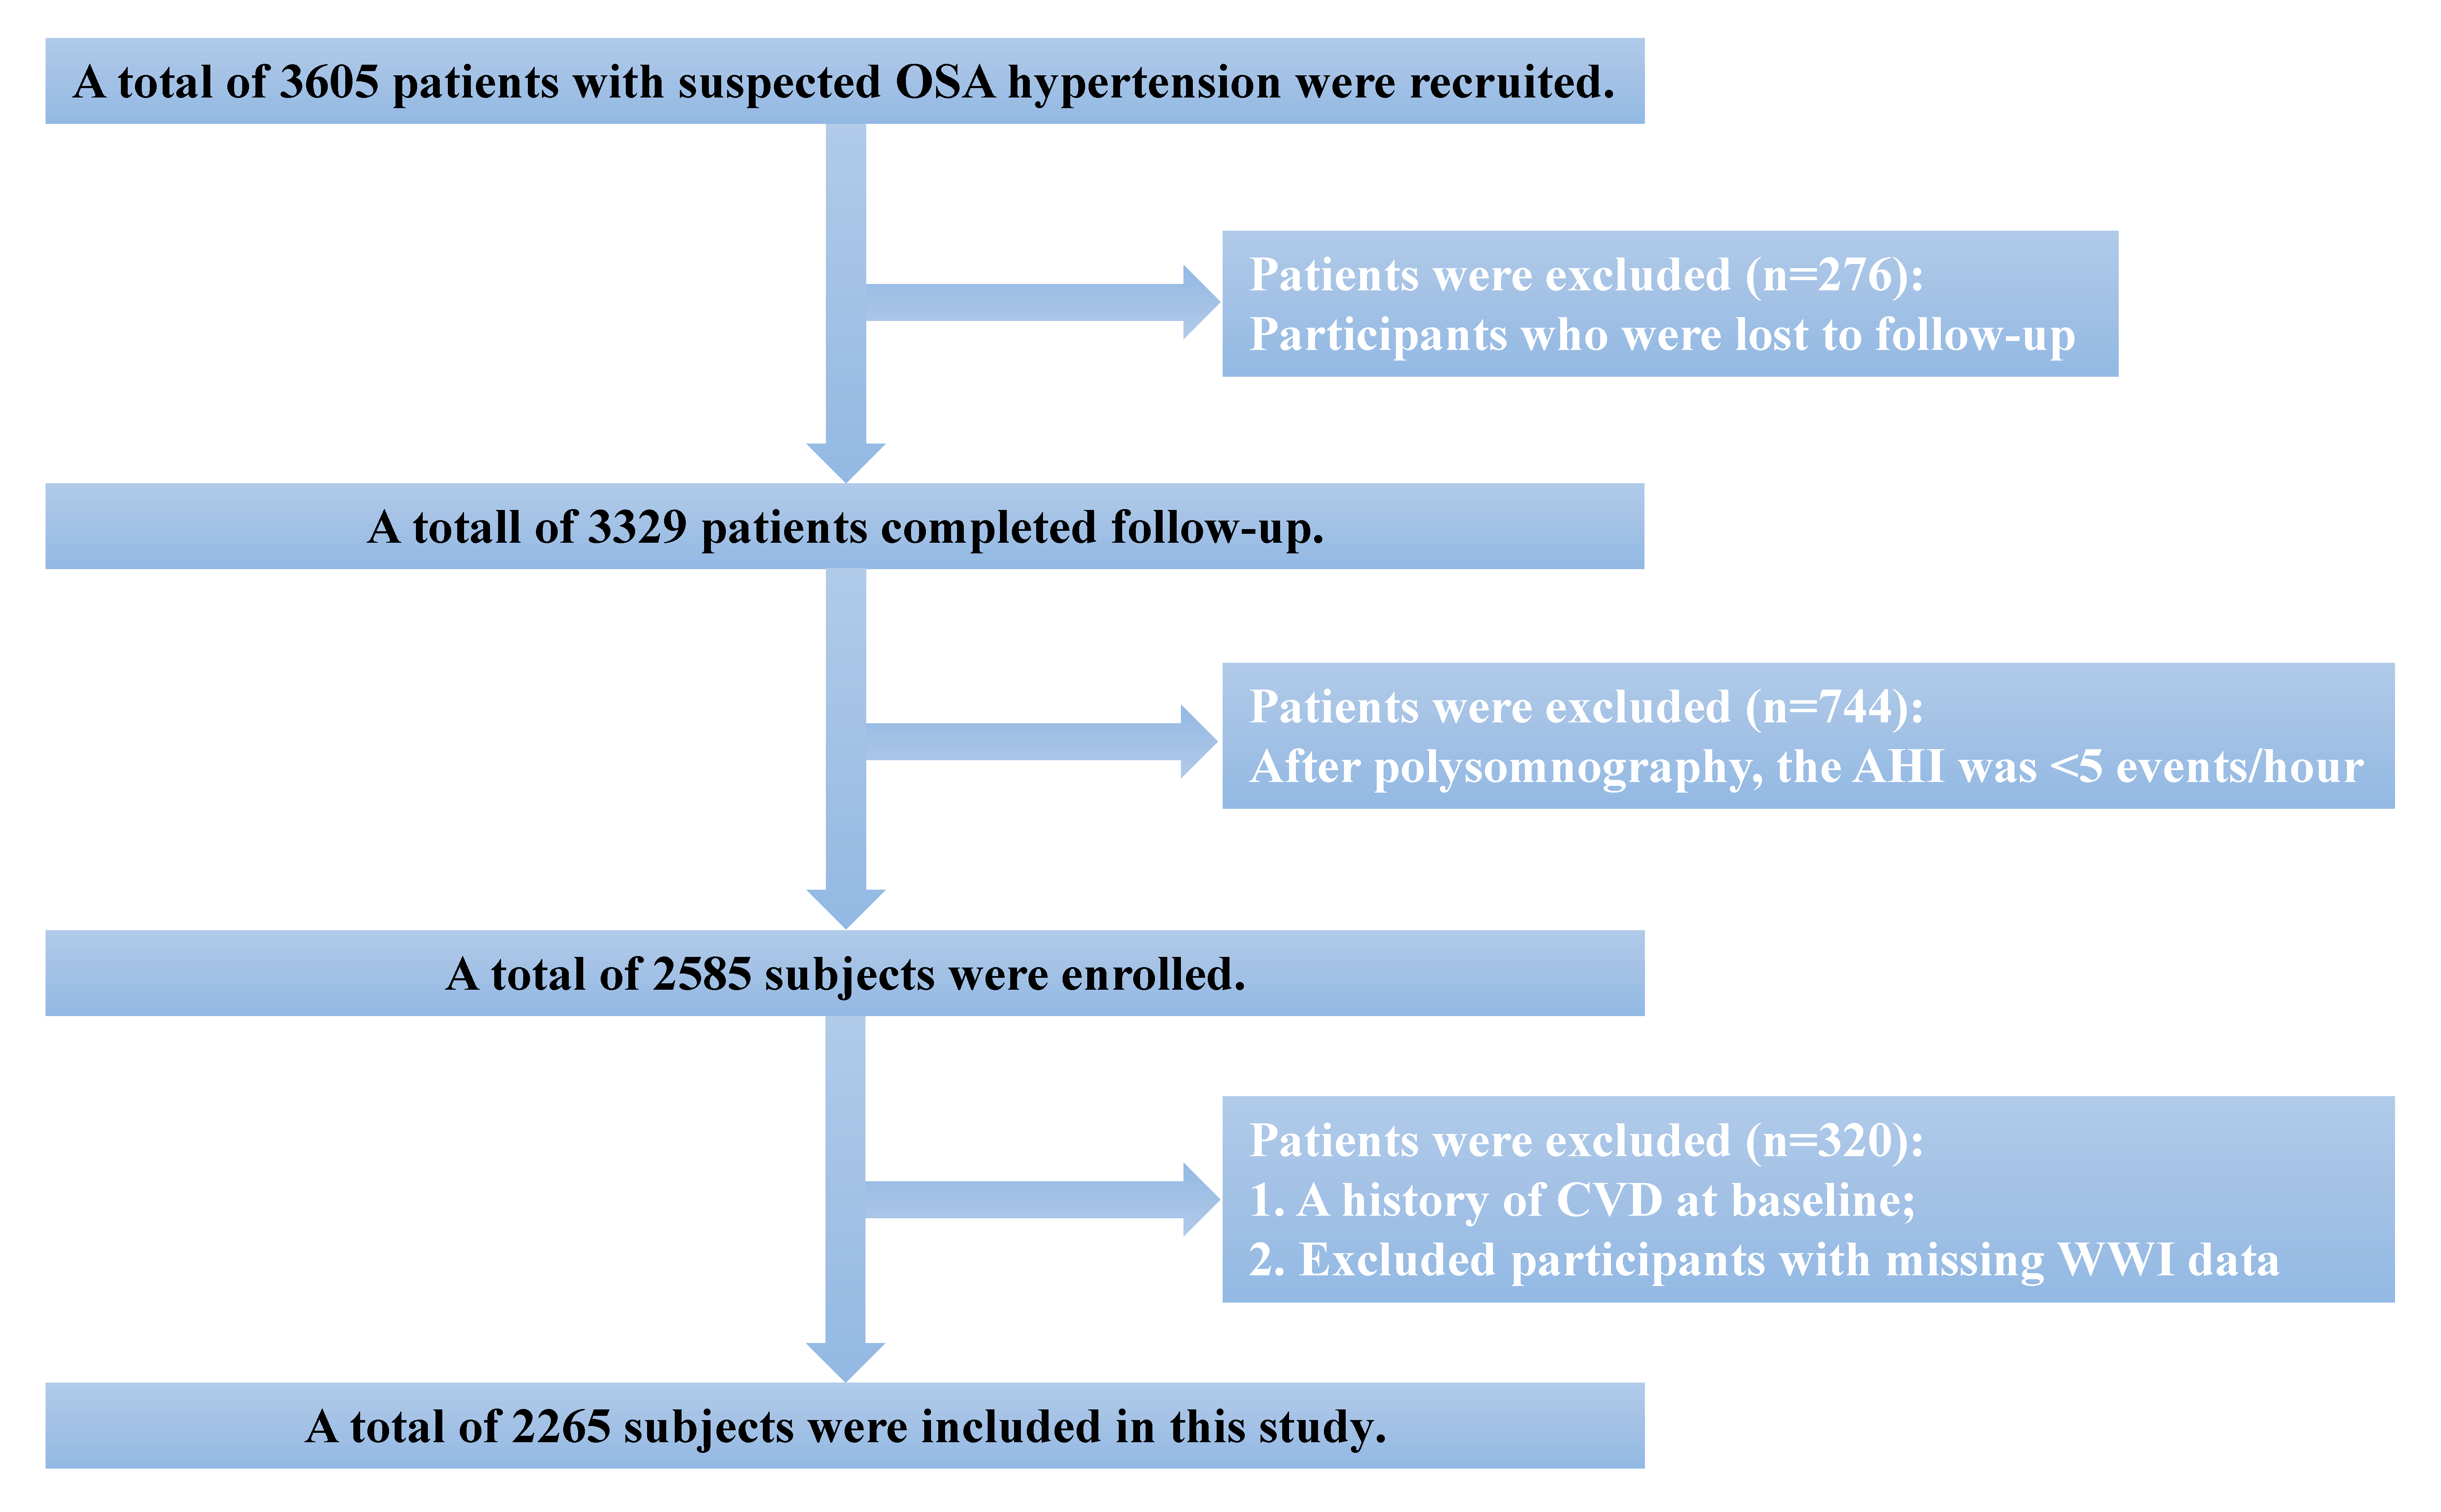
**

**Figure S1** Flowchart of the study.


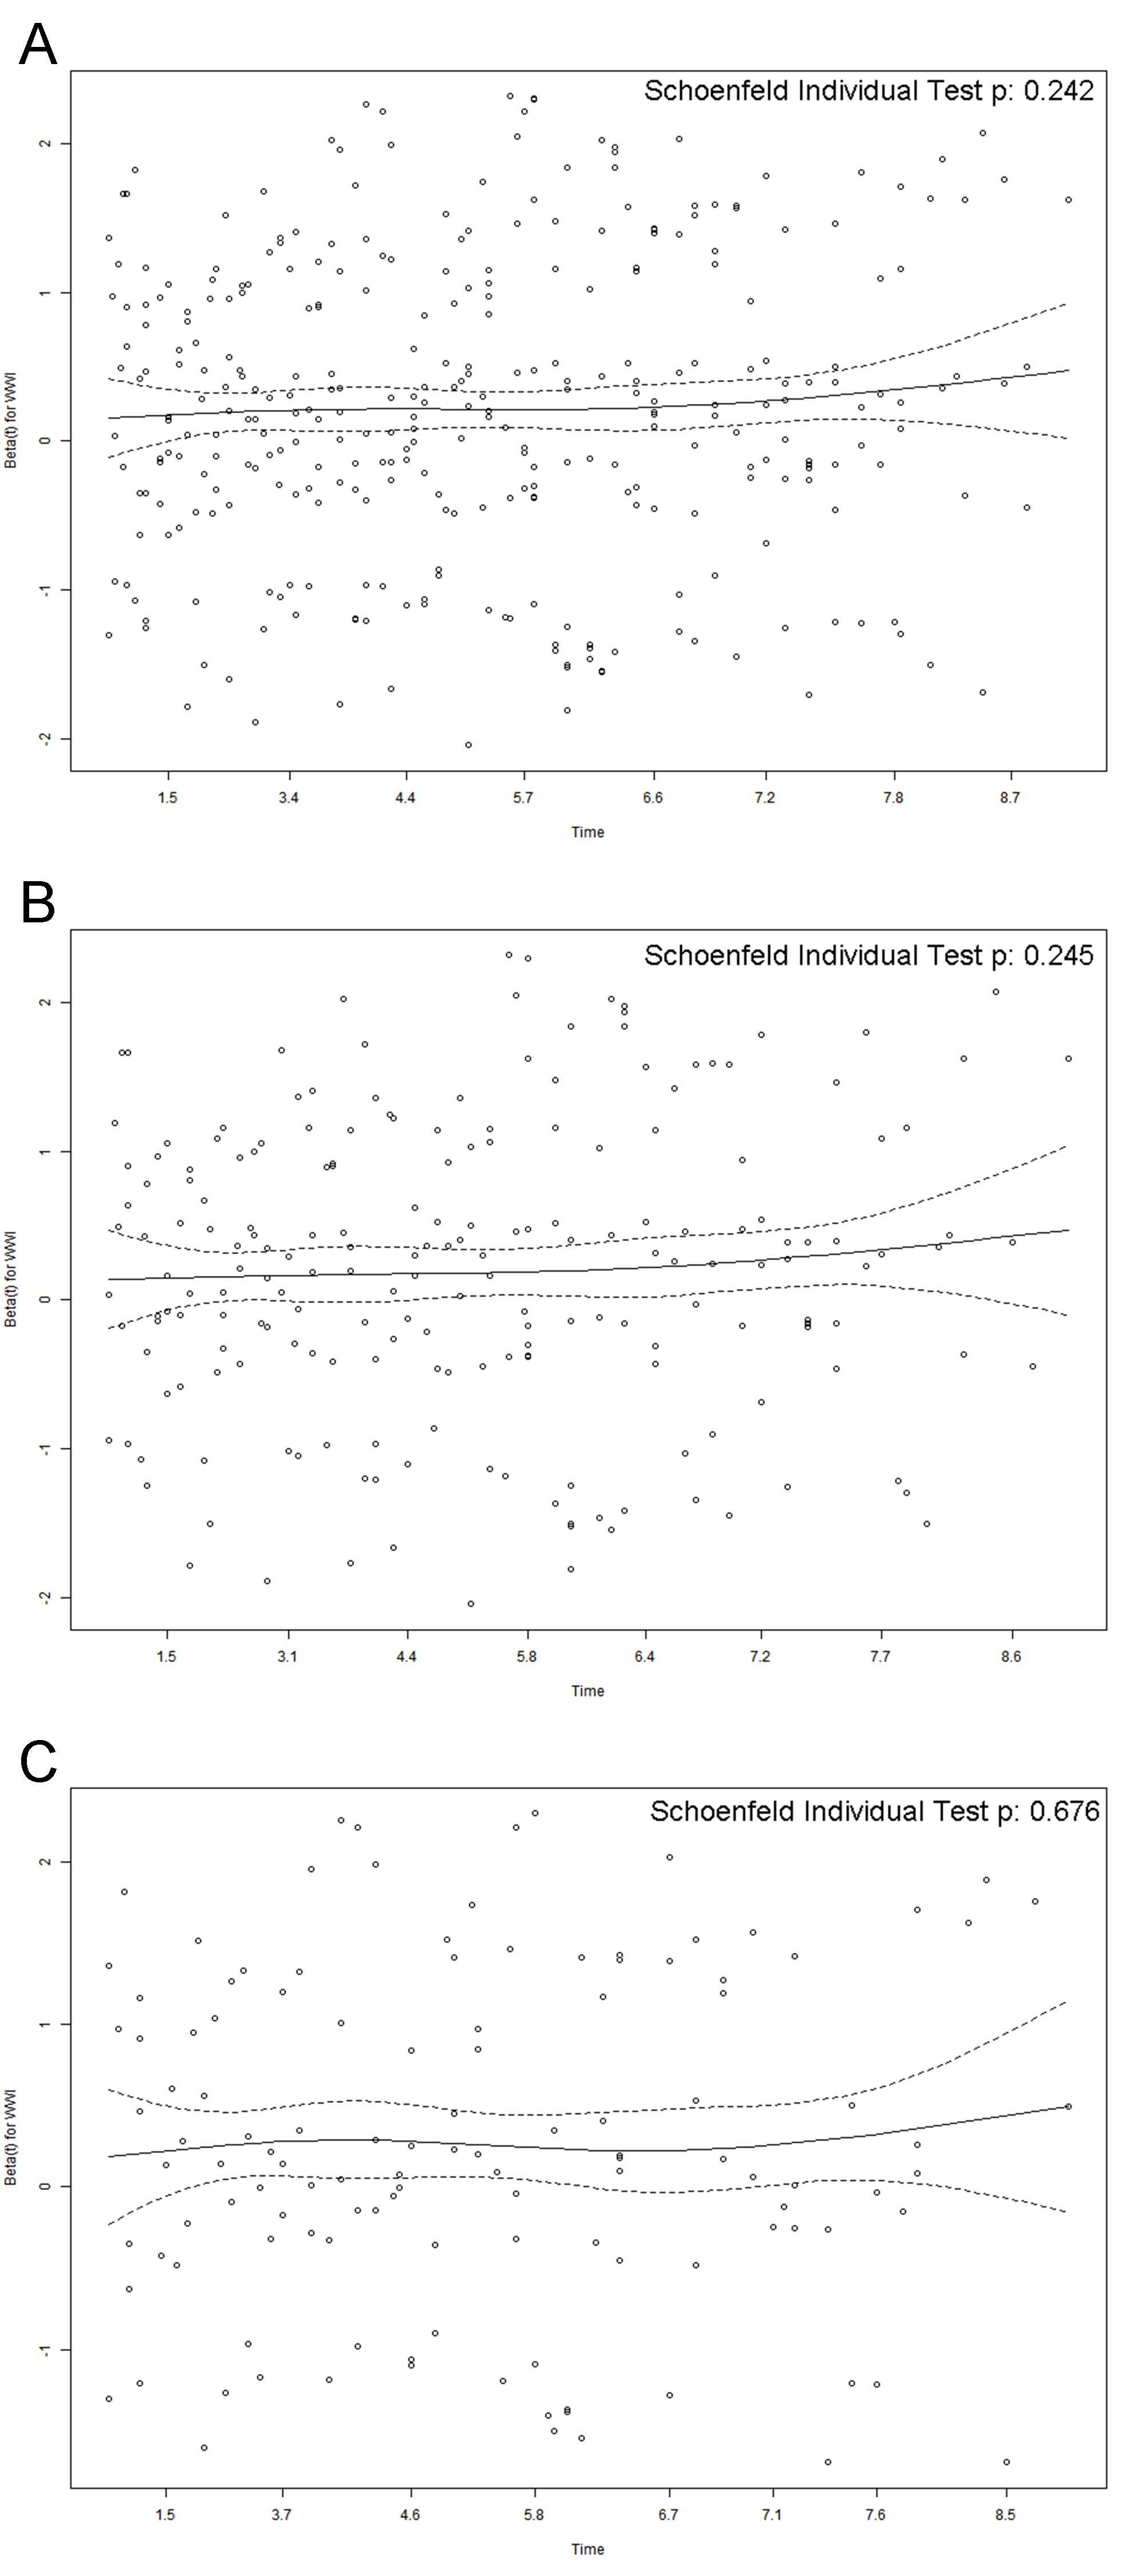


**Figure S2** Plot of Schoenfeld residuals against time in the Cox regression model. (a) cardiovascular disease, (b) coronary heart disease, and (c) stroke.


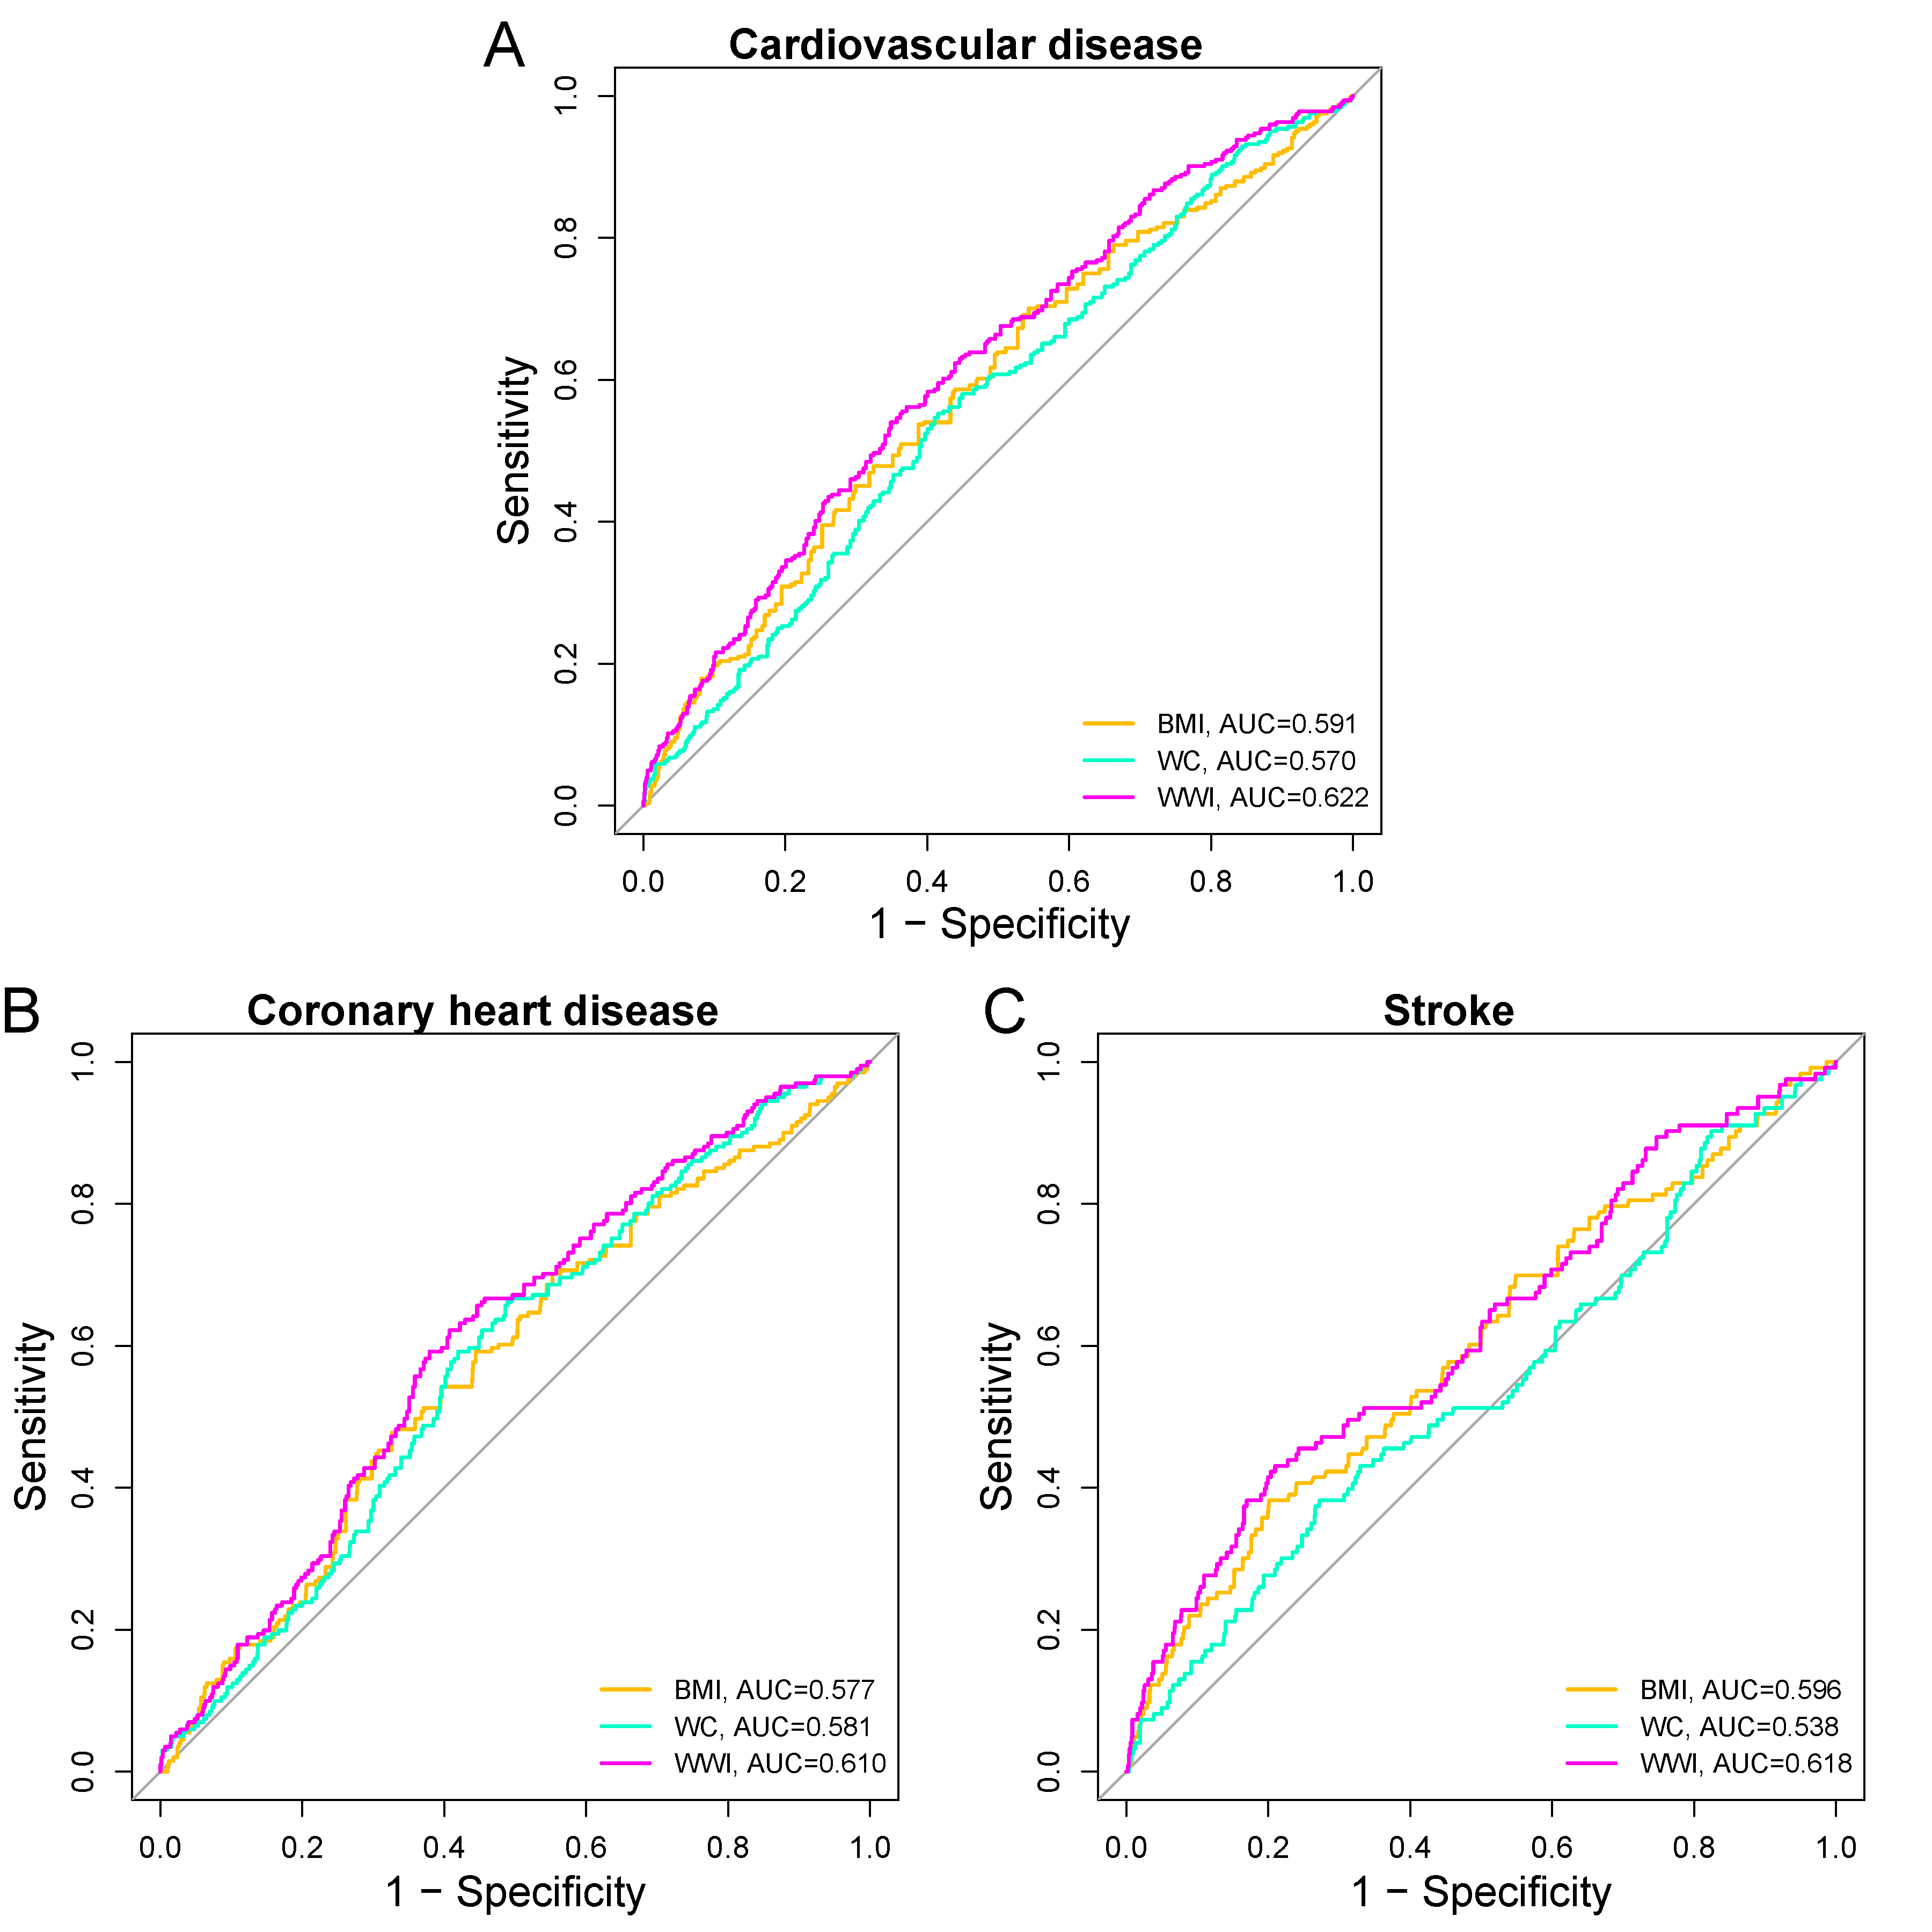


**Figure S3**  Comparative analysis between WWI, BMI and WC. (a) cardiovascular disease, (b) coronary heart disease, and (c) stroke.

**References**

[1] Berry RB, Budhiraja R, Gottlieb DJ, et al. Rules for scoring respiratory events in sleep: update of the 2007 AASM Manual for the Scoring of Sleep and Associated Events. Deliberations of the Sleep Apnea Definitions Task Force of the American Academy of Sleep Medicine. J Clin Sleep Med. 2012. 8(5): 597-619.

[2] Rechtschaffen A, Kales A (1968) A manual of standardized terminology, techniques and scoring system for sleep stages of human subjects. National Institutes of Health, Washington DC.

[3] Iber C, Ancoli-Israel S, Chesson A (2007) The AASM manual for the scoring of sleep and associated events: rules, terminology, and technical specifications, 1st edn. American Academy of Sleep Medicine, Westchester.

[4] EEG arousals: scoring rules and examples: a preliminary report from the Sleep Disorders Atlas Task Force of the American Sleep Disorders Association. Sleep. 1992. 15(2): 173-84.

[5] Myocardial infarction redefined--a consensus document of The Joint European Society of Cardiology/American College of Cardiology Committee for the redefinition of myocardial infarction. Eur Heart J. 2000. 21(18): 1502-13.
